# Supplementary material for: CRISPRDetect: A flexible algorithm to define CRISPR arrays
Source: PubMed Central journal article supplement (PMC4869251; doi:10.1186/s12864-016-2627-0), 2016-05-17
Supplement: 12864_2016_2627_MOESM1_ESM.pdf [file 12864_2016_2627_MOESM1_ESM.pdf]

## Biswas et al 2016. Additional files

### Additional File S1. CRISPRDetect array quality scoring scheme

#### 1. Presence of either *cas1* or *cas2* genes in the genome is awarded (+1, or 0). (cas)

This method is only applied when an annotation file (NCBI gbk or gbff file) is used as input. The annotation files are searched (term based) to create a list of all *cas* genes present in the genome. The scoring system awards the quality score with '+1' when annotation of either *cas1* or *cas2* genes are present in the input file.

#### 2. Match to known repeat using a set of reference repeats from high confidence arrays (+3). (likely repeat)

We use 26 experimentally verified representative repeats as reference and increased the set of known repeats by allowing up to 7 base mismatches. This extended set of ~400 repeat was used to predict a higher confidence set. Arrays were predicted then those with greater than 7 repeats and scores > 4 were used to predict a set of likely repeats. This file was converted in to a BLAST database and potential repeat searched against that with blastn-short which is optimised for short sequences. When a match is found, the array quality score is awarded '+3'.

#### 3. Repeat has at least 23 bases and ATTGAAA(N) at the end (+3, or 0). (motif\_match)

Another feature adapted from the CRISPRDirection algorithm is the presence of motif ATTGAAA(N) at the 3' end of repeats. We observed that, this motif is an accurate indicator of the direction of transcription. In that paper we also observed that all the potential repeats that are >=23nt long containing this motif were genuine CRISPRs. Hence, we used this information to contribute to the quality score, and the quality score is awarded with '+3' when the repeats are >=23nt long and contains ATTGAAA(N) at the 3' end.

#### 4. Overall repeat identity within an array (0 to 1). (overall\_repeat\_identity)

The overall repeats identity score (S) is calculated using the following method

$$S = (\text{average \% identity of the repeats} - 80) / 20$$

The maximum possible positive score can be 1 (when all repeats are identical). However, the score will be negative, when the overall repeat identity is <80%.

#### 5. The repeats in the array do not form one sequence similarity cluster (-1.5, or 0). (one\_repeat\_cluster)

The repeat are clustered using CD-HIT-EST if they form more than one cluster the quality score is penalized by '-1.5'.

## 6. Scoring the repeat lengths (range -3 to +1). (exp\_repeat\_length)

In this method, we use the table of repeat length distribution (Figure 3). The relative score (S) for a repeat of length (L) is determined using the following rules:

$$S = 0.25 + L/H \quad \text{[where, } L \geq 23 \text{ and } L \leq 47;$$

H is the most abundant repeat length for bacteria or archaea]

$$S = -0.25 * (23 - L) \quad \text{[where, } L < 23]$$

$$S = -0.25 * (L - 47) \quad \text{[where, } L > 47]$$

The maximum negative score limit is set to -3, and maximum positive score limit is +1.

## 7. Scoring the spacer lengths (range -3 to +3). (exp\_spacer\_length)

In this method, each spacer of an array is independently scored, and counted towards a final spacer length score. The individual spacer length score (S) for a spacer with length (L) within the range 28-48 (see Fig 3B) are awarded a positive score using the formula:

$$S = 0.01 + N/H \quad \text{[where, } 27 < L \leq 48;$$

N= Total number of spacers of this length;  
H= Most abundant spacer length for bacteria or archaea

Any spacer length outside this range is penalised by the following rule:

$$S = -0.10 * (28 - L) \quad \text{[where, } L < 28]$$

$$S = -0.10 * (L - 48) \quad \text{[where, } L > 48]$$

Finally, an average spacer score for the current array is calculated using

$$\text{Average score} = \text{Sum\_of\_scores} / \text{no\_of\_spacers}$$

The maximum negative score limit is -3 and maximum positive score limit is +1.

## 8. Overall spacer identity (-3 to +1) (spacer\_identity)

In this method we test the sequence (dis)similarity among all the spacers. If the spacers are all near identical it is more likely to be a direct repeat, possibly a tandem repeat rather than a CRISPR array. If the spacers belong to a total number of clusters (C) with identity  $\geq 80\%$ , the spacer identity score (S) for an array with number of spacers (N) is calculated using the following rule:

$$S = -3 \quad [\text{where, } C \leq \text{integer}(N/2); ]$$

$$S = 0.20 * C \quad [\text{where, } C > \text{integer}(N/2); ]$$

The positive score limit is +1.

### 9. Scoring total number of identical repeats 0 to +1) (log(total repeats) - log(total mutated repeats))

Since longer arrays, and those with a greater number of identical repeats are more likely to be a true CRISPR, this scoring method uses both. If an array contains 'P' identical repeats out of the 'N' total number of repeats, then the score (S) is calculated using the following rule:

$$S = \log(N) - \log(N-P) \quad [\text{where, } P = \text{Identical repeats, } N = \text{total number of repeats}]$$

The maximum positive score limit is +1.

In CRISPRDetect scoring system the sum total of the scores can range from +13 to -12.5.

**Additional file S2 Comparison of three widely used CRISPR prediction tools with CRISPRDetect.**

| <b>Feature</b>                                                                                       | <b>PILER-CR</b>               | <b>CRT</b>      | <b>CRISPI</b> | <b>CRISPRFinder</b>           | <b>CRISPRDetect</b>           |
|------------------------------------------------------------------------------------------------------|-------------------------------|-----------------|---------------|-------------------------------|-------------------------------|
| Identifies insertion/deletions in repeats and spacers                                                | yes                           | no              | n/a           | no                            | yes                           |
| Identifies complete spacer deletions                                                                 | no                            | no              | n/a           | no                            | Yes                           |
| Identifies degenerate repeats in putative spacer sequence                                            | no                            | no              | no            | no                            | yes                           |
| Identifies degenerated repeat and/or spacer in flanking regions                                      | yes (threshold <sup>1</sup> ) | yes (threshold) | n/a           | yes (uses dedicated function) | yes (uses dedicated function) |
| Identifies spacerless genomic tandem repeats                                                         | no                            | no              | n/a           | yes (with limitations)        | yes                           |
| Extends arrays with a lower stringency. Joins closely spaced arrays separated by degenerated repeats | no                            | no              | n/a           | yes                           | yes                           |
| Removal of falsely predicted degenerated repeats from CRISPRs                                        | n/a                           | n/a             | n/a           | no                            | yes                           |
| Shows flanking regions of the CRISPRs in the output                                                  | yes (partial, max 10nt)       | no              | no            | no                            | yes                           |
| Identification of arrays with only 2 repeats                                                         | no                            | yes             | n/a           | yes                           | yes                           |
| Compares to a database of known repeats and features                                                 | no                            | no              | yes           | yes                           | yes                           |
| Annotates arrays at the end of circular genomes                                                      | no                            | no              | n/a           | no                            | yes                           |

|                                              |     |     |     |                        |                        |
|----------------------------------------------|-----|-----|-----|------------------------|------------------------|
| Determines family/type                       | no  | no  | no  | no                     | yes                    |
| Determines the representative repeat         | yes | no  | no  | yes                    | yes                    |
| Determines the CRISPR direction              | no  | no  | no  | no                     | yes                    |
| Shows <i>cas</i> genes present in the genome | no  | no  | yes | no                     | yes                    |
| Interactive web interface                    | no  | no  | yes | yes                    | yes                    |
| Pipeline version                             | yes | yes | no  | yes (part)             | yes                    |
| Supporting database                          | no  | no  | yes | yes (CRISPRdb)         | yes (CRISPRBank)       |
| User defined dictionary of spacers           | no  | no  | no  | yes (CRISPRtionary)    | no                     |
| Compare flanks of two arrays                 | no  | no  | no  | yes (FlankAlign)       | <b>no</b>              |
|                                              |     |     |     |                        | <b>no</b>              |
| Compare two more arrays                      | no  | no  | no  | yes<br>(CRISPRCompare) |                        |
| Classify repeat into families                | no  | no  | no  | no                     | <b>yes<sup>2</sup></b> |

---

<sup>1</sup> In CRT 'threshold' refers to the global repeat/spacer identity parameter. PILER-CR and CRT do not support the use of specific parameters (e.g. a threshold) to identify degenerated repeat/spacers.

<sup>2</sup>. Gives an indication only, CRISPRMap gives a more comprehensive analysis.

**Additional file S3.**  
**As Figure 3 except that**  
**all strains are included.**

a. Repeat Length

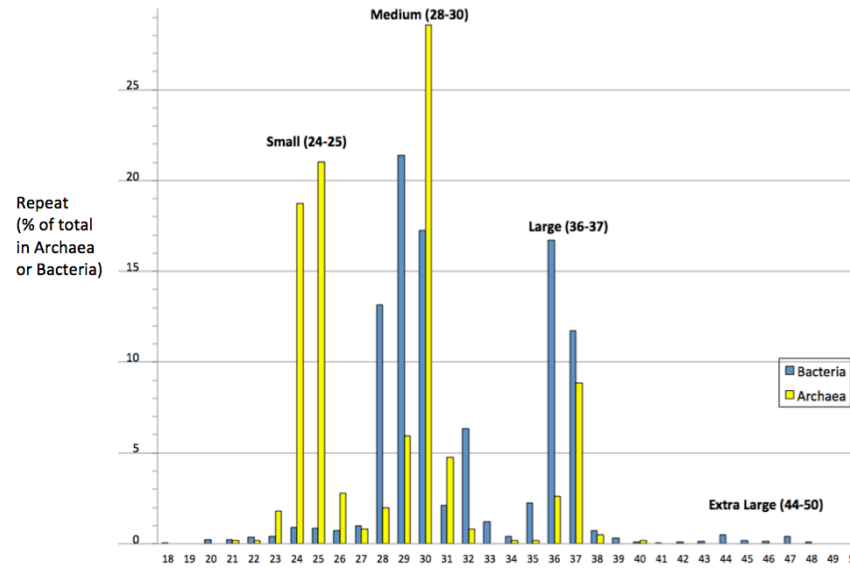

b. Spacer Length

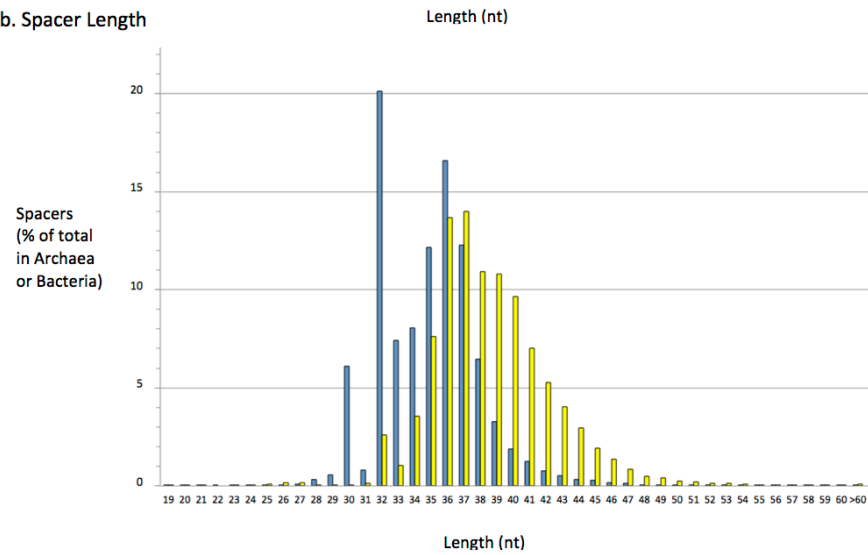

## Additional File S4.

### Initial Prediction

| Repeat                      | Spacer                        |
|-----------------------------|-------------------------------|
| =====                       | =====                         |
| .....-.....                 | GGACAGCAACCCGTGTCGGATATCAGACT |
| .....-.....                 | ACGCGAATCGCCAATCGCCGCGGTGAGC  |
| GC.....TGATCA               | CGATGTATGCCGACCGTGATTTTATGTC  |
| .....-.....                 | AGATACGCCTTTACGTGCGCTCTA      |
| ATTC.....G.....             | TAAAACACCCGTTGCGCAACCTGCAACGG |
| .....-.....                 | TCTAAATCTA -//-               |
| =====                       | =====                         |
| CGGTTTATCCCGC-TGGCGGGGATCAC |                               |

### Refined Prediction

| Repeat                     | Spacer                        | Insertion/Deletion                              |
|----------------------------|-------------------------------|-------------------------------------------------|
| =====                      | =====                         | =====                                           |
| .....                      | GGACAGCAACCCGTGTCGGATATCAGACT |                                                 |
| .....                      | ACGCGAATCGCCAATCGCCGCGGTGAG   |                                                 |
| .....                      | GATGTATGCCGACCGTGATTTTATGTC   | C, T [X <sub>1</sub> , X <sub>2</sub> ]         |
| .....                      | AGATACGCCTTTACGTGCGCTCTAATTC  |                                                 |
| -----                      | TAAAACACCCGTTGCGCAACC         | G [X <sub>3</sub> ], Deletion [X <sub>4</sub> ] |
| .....                      | TCTAAATCTA -//-               |                                                 |
| =====                      | =====                         | =====                                           |
| CGGTTTATCCCGCTGGCGGGGATCAC |                               |                                                 |

**S4A.** A hypothetical array is shown before and after refinement. The bases belonging to the flanks are shown in green, repeat bases are shown in blue and insertion(s) are shown in red, X1 and X2 refers to corresponding positions of the insertions or deletions.

### Initial prediction

| Repeat               | Spacer               |
|----------------------|----------------------|
| =====                | =====                |
| .....                | GGACAGCAACCCGTGTCGGA |
| .....T               | TCACACGCGAATCGCCAATC |
| .....                | GATGTATGCCGACCGTGATT |
| .....                | AGATACGCCTTTACGTGCCC |
| .....                | GAAAACACCCGTTGCGCAAC |
| .....                | GCTAAAT -//-         |
| =====                | =====                |
| GGTTTATCCCGCTATTGAAA |                      |

GGTTTATCCCGCTATTGAAA- Rep. repeat  
 ATTGAAAN Ref. Motif

### Refined Prediction

| Repeat               | Spacer               |
|----------------------|----------------------|
| =====                | =====                |
| .....                | GGACAGCAACCCGTGTCGGA |
| .....                | TCACACGCGAATCGCCAATC |
| .....                | GATGTATGCCGACCGTGATT |
| .....                | AGATACGCCTTTACGTGCCC |
| .....                | TAAAACACCCGTTGCGCAAC |
| .....                | TCTAAAT -//-         |
| =====                | =====                |
| GGTTTATCCCGCTACCGATA |                      |

GGTTTATCCCGCTACCGATA Rep. repeat  
 -GTTTATCCCGCTACCGAT- Ref. repeat

| Repeat                | Spacer              |
|-----------------------|---------------------|
| =====                 | =====               |
| .....                 | GACAGCAACCCGTGTCGGA |
| .....T                | CACACGCGAATCGCCAATC |
| .....                 | ATGTATGCCGACCGTGATT |
| .....A                | GATACGCCTTTACGTGCCC |
| .....                 | AAAACACCCGTTGCGCAAC |
| .....                 | CTAAAT -//-         |
| =====                 | =====               |
| GGTTTATCCCGCTATTGAAAG |                     |

| Repeat             | Spacer                 |
|--------------------|------------------------|
| =====              | =====                  |
| .....              | AGGACAGCAACCCGTGTCGGA  |
| .....              | ATCACACGCGAATCGCCAATCG |
| .....              | AGATGTATGCCGACCGTGATTG |
| .....              | AAGATACGCCTTTACGTGCCC  |
| .....              | ATAAACACCCGTTGCGCAAC   |
| .....              | ATCTAAAT -//-          |
| =====              | =====                  |
| GTTTATCCCGCTACCGAT |                        |

### S4B. Comparison to a reference motif and known repeat from CRISPRBank.

**Initial Prediction**

| Flank                          | Repeat                  | Spacer                            |
|--------------------------------|-------------------------|-----------------------------------|
| TGCAGGTTTATCCCCGCTGGCGATATGCAA | .....                   | GGACAGCAACCCGTGTCGGAT             |
|                                |                         | TCACACGCGAATCGCCAATCG             |
|                                |                         | GATGTATGCCGACCGTGATTT             |
|                                |                         | AGATACGCCTTTACGTCGCCT             |
|                                |                         | TAAACACCGGTTGCGCAACC              |
|                                |                         | TCTAAATCTTTATCCCCACTGGCGGAAA -//- |
|                                | CGGTTTATCCCCGCTGGCGGGGG |                                   |

**Refined Prediction**

| Flank    | Repeat  | Spacer                  |
|----------|---------|-------------------------|
| -//- TGC | A.....  | ATATGCAA                |
|          |         | GGACAGCAACCCGTGTCGGAT   |
|          |         | TCACACGCGAATCGCCAATCG   |
|          |         | GATGTATGCCGACCGTGATTT   |
|          |         | AGATACGCCTTTACGTCGCCT   |
|          |         | TAAACACCGGTTGCGCAACC    |
|          |         | TCTAAATCT               |
|          | A.....  | AAATGCTAAGCTATTGCAGTA   |
| .C.....  | .A..... | CTAG -//-               |
|          |         | CGGTTTATCCCCGCTGGCGGGGG |

← Extension

### S4C. Extension of the array

**A.**

| Flank     | Repeat                      | Spacer                             |
|-----------|-----------------------------|------------------------------------|
| TATGCCGAA | -----                       | GGACAGCAACCCGTGTCGGATATCAGACT      |
|           |                             | TCACACGCGAATCGCCAATCGCCGCGGTGAG    |
|           |                             | GATGTATGCCGACCGTGATTTTAGTCAT       |
|           |                             | AGATACGCCTTTACGTCGCCTCTAATTAACGGTA |
|           |                             | TAAACACCGGTTGCGCAACC               |
|           |                             | TCTAAATCTA                         |
|           | CGGTTTATCCCCGCTGGCGGGGATCAC |                                    |

**B.**

| Repeat                      | Spacer                        | Insertion/Deletion   |
|-----------------------------|-------------------------------|----------------------|
| .....                       | GGACAGCAACCCGTGTCGGATATCAGACT | AA [X <sub>1</sub> ] |
| .....C.....                 | ACGCGAATCGCCAATCGCCGCGGTGAG   |                      |
| .....                       | GATGTATGCCGACCGTGATTTTAGTCAT  |                      |
| .....                       | AGATACGCCTTTACGTCGCCTCTAATTA  | A [X <sub>2</sub> ]  |
| .....                       | TAAACACCGGTTGCGCAACC          |                      |
| .....T                      | TCTAAATCTA                    |                      |
| CGGTTTATCCCCGCTGGCGGGGAACAC |                               |                      |

### S4D. Inclusion of an initial predicted spacer bases in the repeats.



**Additional File S5. Comparison of predictions from CRISPRDetect, PILER-CR, CRT and CRISPRFinder for the identification of partial/total spacer loss in *Salmonella enterica* subsp. *enterica* serovar Typhi str. CT18, array beginning at 2,926,568.**

**#----- predicted by CRISPRDetect**

Array 1 2926568-2926181 \*\*\*\* Predicted by CRISPRDetect 2.1 \*\*\*  
 >gi|16758993|ref|NC\_003198|-Salmonella enterica subsp. enterica serovar Typhi str. CT18, Array\_Orientation: Reverse

| Position | Repeat | %id   | Spacer | Repeat_Sequence              | Spacer_Sequence                    | Insertion/Deletion |
|----------|--------|-------|--------|------------------------------|------------------------------------|--------------------|
| 2926568  | 29     | 100.0 | 0      | .....                        | -                                  | Deletion [2926539] |
| 2926539  | 26     | 86.2  | 0      | ---A.....                    | -                                  | Deletion [2926536] |
| 2926513  | 26     | 86.2  | 32     | ---A.....                    | ATCCCCGCGGAGGTTGCGCAACCGGTGTTTTA   |                    |
| 2926455  | 29     | 100.0 | 32     | .....                        | CGCGCCAAAGAGGGCGACGTAAAGCGTATCT    |                    |
| 2926394  | 29     | 100.0 | 32     | .....                        | GCGGTA AAAATCACGGTCGGCATAACATCGTGG |                    |
| 2926333  | 29     | 100.0 | 32     | .....                        | CAATTCACGCGGGCGGATTGGCGATTGCGGT    |                    |
| 2926272  | 29     | 100.0 | 32     | .....                        | ATCTGTCTGATATCCGACACGGGTTGCTGTCC   |                    |
| 2926211  | 29     | 100.0 | 0      | .....                        |                                    | A [2926183]        |
| 8        | 29     | 96.5  | 23     | GTGTTCCCGCGCCAGCGGGGATAAACCG |                                    |                    |

# Left flank : TGTTGAAAATCAATAAGTTAGAGATCTTTAAAAATTAGGAAAAGTTGGTGGGTTTTTTGTGCGCTAAAAAAGTATTTAAATTCAATTGGGTAGATTTAGA  
 # Right flank : TTTACCAGCATATCAGGACGTTTTTTCCGCCTTCGCCAGCTCTTTTACCAACGGCAGCATTTATCCGACTACATCGCGGCTACGGCGCTCAATCCGCC

# Questionable array : NO Score: 7.77  
 # Score Detail : 1:1, 2:3, 3:0, 4:0.83, 5:0, 6:1, 7:-0.06, 8:1, 9:1,  
 #  
 # Score Legend : 1: cas, 2: likely\_repeat, 3: motif\_match, 4: overall\_repeat\_identity, 5: one\_repeat\_cluster, 6: exp\_repeat\_length, 7:exp\_s  
 pacer\_length, 8: spacer\_identity, 9: log(total repeats) - log(total mutated repeats),  
 # Primary repeat : GTGTTCCCGCGCCAGCGGGGATAAACCG  
 # Alternate repeat : NA

# Directional analysis summary from each method:  
 # Motif ATTGAAA(N) match prediction: NA Score: 0/4.5  
 # A,T distribution in repeat prediction: R [4,5] Score: 0.37/0.37  
 # Reference repeat match prediction: R [matched GTGTTCCCGCGCCAGCGGGGATAAACCG with 100% identity] Score: 4.5/4.5  
 # Secondary Structural analysis prediction: R [-12.50,-13.40] Score: 0.37/0.37  
 # Array degeneracy analysis prediction: R [1-0] Score: 0.41/0.41  
 # AT richness analysis in flanks prediction: R [50.0-70.0]%AT Score: 0.27/0.27  
 # Longer leader analysis prediction: R [15,85] Score: 0.18/0.18  
 # -----  
 # Final direction: R [0,6.1 Confidence: HIGH]

# Identified Cas genes: CRISPR/Cas system associated Cas1:NP\_457327 [2926948-2927865]; CRISPR/Cas system associated Cse2:NP\_457331 [2930385-  
 2930987]; CRISPR/Cas system associated RAMP super Unclassified\_Cas\_protein:NP\_457328 [2927865-2928569]; Cas1:NP\_457327 [2926948-  
 2927865]; Cas5:NP\_457329 [2928569-2929294]; Cas7:NP\_457330 [2929304-2930368]; Cse1:NP\_457332 [2931004-2932539]; Cse2:NP\_457331 [2930385-

2930987]; DinG helicase Csf4:NP\_456328 [1840118-1842028]; RAMP Cas5:NP\_457329 [2928569-2929294]; RAMP Cas6e:NP\_457328 [2927865-2928569]; Transcriptional regulator CasRa Unclassified\_Cas\_protein:NP\_455939 [1470680-1471168];  
 # Array family : I-E [Matched known repeat from this family],  
 # Sequence source strain : CT18  
 # Taxonomy hierarchy : Bacteria; Proteobacteria; Gammaproteobacteria; Enterobacteriales; Enterobacteriaceae; Salmonella.; Salmonella enterica subs p. enterica serovar Typhi str. CT18  
 //

**#----- Predicted by PILER-CR**

Array 1  
 >NC\_003198

| Pos                                                                                | Repeat | %id   | Spacer | Left flank | Repeat                       | Spacer                           |
|------------------------------------------------------------------------------------|--------|-------|--------|------------|------------------------------|----------------------------------|
| 2926184                                                                            | 29     | 93.1  | 32     | GGTGAAACGT | --.....                      | GGACAGCAACCCGTGTCGGATATCAGACAGAT |
| 2926245                                                                            | 29     | 100.0 | 32     | TCAGACAGAT | .....                        | ACGCGAATCGCCAATCGCCGCCGCGTGAATTG |
| 2926306                                                                            | 29     | 100.0 | 32     | GCGTGAATTG | .....                        | CCACGATGTATGCCGACCGTGATTTTACC GC |
| 2926367                                                                            | 29     | 100.0 | 32     | TTTTTACCGC | .....                        | AGATACGCCTTTACGTGCCCCCTTTGGCGCG  |
| 2926428                                                                            | 29     | 100.0 | 84     | CTTTGGCGCG | .....                        |                                  |
| TAAAACACCGGTTGCGCAACCTCCGCGGGGATCGGTTTATCCCGCTGGCGCGGGGATCGGTTTATCCCGCTGGCGCGGGGAT |        |       |        |            |                              |                                  |
| 2926541                                                                            | 29     | 100.0 |        | GCGCGGGGAT | .....                        | TCTAAATCTA                       |
| 6                                                                                  | 29     |       | 42     |            | CGGTTTATCCCGCTGGCGCGGGGAACAC |                                  |

**#----- predicted by CRT**

CRISPR 10 Range: 2926182 - 2926567

| POSITION | REPEAT                       | SPACER                                      |
|----------|------------------------------|---------------------------------------------|
| 2926182  | GTGTTTATCCCGCTGGCGCGGGGAACAC | GGACAGCAACCCGTGTCGGATATCAGACAGAT [ 29, 32 ] |
| 2926243  | CGGTTTATCCCGCTGGCGCGGGGAACAC | ACGCGAATCGCCAATCGCCGCCGCGTGAATTG [ 29, 32 ] |
| 2926304  | CGGTTTATCCCGCTGGCGCGGGGAACAC | CCACGATGTATGCCGACCGTGATTTTACC GC [ 29, 32 ] |
| 2926365  | CGGTTTATCCCGCTGGCGCGGGGAACAC | AGATACGCCTTTACGTGCCCCCTTTGGCGCG [ 29, 32 ]  |
| 2926426  | CGGTTTATCCCGCTGGCGCGGGGAACAC | TAAAACACCGGTTGCGCAACCTCCGCGGGGAT [ 29, 32 ] |
| 2926487  | CGGTTTATCCCGCTGGCGCGGGGATCGG | TTTATCCCGCTGGCGCGGGGAT [ 29, 23 ]           |
| 2926539  | CGGTTTATCCCGCTGGCGCGGGGAACAC |                                             |

Repeats: 7 Average Length: 29 Average Length: 30

**#----- predicted by CRISPRFinder**

```
#####
# Program: Crispr Finder Program
# Author: Ibtissem GRISSA
# Rundate (GMT): 16/11/2006 15:27:24
# Report_file: /var/www/crispr/databases/Output/220341/NC_003198/NC_003198_1
#####
```

```

#####
#
# Sequence: NC_003198
# Description: Salmonella enterica subsp. enterica serovar Typhi str. CT18, complete genome
# Length: 4809037
# Id: gi|16758993|ref|NC_003198.1|
#
#####
# Crispr Rank in the sequence: 1
# Crispr_begin_position: 2926182      Crispr_end_position: 2926515
# DR: CGGTTTATCCCCGCTGGCGCGGGGAACAC  DR_length: 29  Number_of_spacers: 4
Spacer_begin_position  Spacer_length  Spacer_sequence
      2926211           32  GGACAGCAACCCGTGTCGGATATCAGACAGAT
      2926272           32  ACGCGAATCGCCAATCGCCGCCGCGTGAATTG
      2926333           32  CCACGATGTATGCCGACCGTGATTTTTACCGC
      2926394           32  AGATACGCCTTTACGTCGCCCTCTTTGGCGCG
      2926455           32  TAAAACACCGGTTGCGCAACCTCCGCGGGGAT
#####
#####

```

**Additional File S6. Reduction in the repeat identity in *E. coli* K-12 DH10B chromosome (array beginning at 2,969,028) identifies additional repeat and spacer in CRISPRDetect web application.**

**#----- CRISPRDetect initial output**

```

Array 1 2969028-2968265      **** Predicted by CRISPRDetect 2.1 ***
>gi|170079663|ref|NC_010473|-Escherichia coli str. K-12 substr. DH10B chromosome, complete      Array_Orientation: Reverse

```

| Position | Repeat | %id   | Spacer | Repeat_Sequence | Spacer_Sequence                   | Insertion/Deletion |
|----------|--------|-------|--------|-----------------|-----------------------------------|--------------------|
| 2969028  | 29     | 100.0 | 32     | .....           | CTTTCGCAGACGCGCGGATACGCTCACGCA    |                    |
| 2968967  | 29     | 100.0 | 32     | .....           | CAGCCGAAGCCAAAGTGATGCCGAACACGCT   |                    |
| 2968906  | 29     | 100.0 | 32     | .....           | GGCTCCCTGTCGGTTGTAATTGATAATGTTGA  |                    |
| 2968845  | 29     | 100.0 | 33     | .....           | TTGGATCGGGTCTGGAATTTCTGAGCGGTTCGC |                    |
| 2968783  | 29     | 100.0 | 33     | .....           | CGAATCGCGCATACCTGCGGTCGCCGCTGC    |                    |
| 2968721  | 29     | 100.0 | 32     | .....           | TCAGCTTTATAAATCCGAGATACGGAACTA    |                    |
| 2968660  | 29     | 96.6  | 32     | .....A.....     | GACTCACCCGAAAGAGATTGCCAGCCAGCTT   |                    |
| 2968599  | 29     | 100.0 | 32     | .....           | CTGCTGGAGCTGGCTGCAAGGCAAGCCGCCA   |                    |
| 2968538  | 29     | 100.0 | 32     | .....           | GGGGCGCATGACCGTAAACATTATCCCCGG    |                    |

```

2968477      29  100.0   32  ..... GGAGTTCAGACATAGGTGGAATGATGGACTAC
2968416      29   93.1   32  .....TT..... CCGGGTAGCCAGGTTTGAACGCCTGAACCGA
2968355      29   96.6   32  .....A..... GCAACGACGGTGAGATTCACGCCTGACGCTG
2968294      29   89.7    0  .T.....AT..... |
=====
13          29   98.2   32  GAGTTCGCCGCGCCAGCGGGGATAAACCG
# Left flank :  AAGAATTAGCTGATCTTTAATAATAAGGAAATGTTACATTAAGGTTGGTGGGTTGTTTTTATGGGAAAAATGCTTTAAGAACAAATGTATACTTTTAGA
# Right flank :  GGCGCACTGGATGCGATGATGGATATCACTTGGAGTTCCCCCGCCTCTGCGGTAGAACTCCAGCTCCCATTTTCAAACCCATCAAGACGCCTTCGCCAA

```

**#--- CRISPRDetect output (partial output) [after reducing the repeat identity to 55% from the default 80%, and using dynamic search]**

```

Array 3 2969028-2968205      **** Predicted by CRISPRDetect 2.1 ***
>NC_010473|Escherichia-coli str. K-12 substr. DH10B chromosome, complete      Array_Orientation: Reverse

Position      Repeat      %id  Spacer  Repeat_Sequence      Spacer_Sequence      Insertion/Deletion
=====
2969028      29  100.0   32  ..... CTTTCGCAGACGCGCGGCATACGCTCACGCA
2968967      29  100.0   32  ..... CAGCCGAAGCCAAAGGTGATGCCGAACACGCT
2968906      29  100.0   32  ..... GGCTCCCTGTGCGTTGTAATTGATAATGTTGA
2968845      29  100.0   33  ..... TTGGATCGGGTCTGGAATTTCTGAGCGGTGCG
2968783      29  100.0   33  ..... CGAATCGCGCATAACCTGCGCGTCGCCGCTGC
2968721      29  100.0   32  ..... TCAGCTTTATAAATCCGGAGATACGGAACTA
2968660      29   96.6   32  .....A..... GACTCACCCGAAAGAGATTGCCAGCCAGCTT
2968599      29  100.0   32  ..... CTGCTGGAGCTGGCTGCAAGGCAAGCCGCCA
2968538      29  100.0   32  ..... GGGGGCGCATGACCGTAAACATTATCCCCCGG
2968477      29  100.0   32  ..... GGAGTTCAGACATAGGTGGAATGATGGACTAC
2968416      29   93.1   32  .....TT..... CCGGGTAGCCAGGTTTGAACGCCTGAACCGA
2968355      29   96.6   32  .....A..... GCAACGACGGTGAGATTCACGCCTGACGCTG
2968294      29   89.7   32  .T.....AT..... GGCGCACTGGATGCGATGATGGATATCACTTG
2968233      28   69.0    0  .....CT.T...T-.G..CT.C |
=====
14          29   96.1   32  GAGTTCGCCGCGCCAGCGGGGATAAACCG
C [2968220]

```

**Additional File S7. A. An example of array extension in *Leptospira interrogans* serovar Lai str. 56601 chromosome I, array beginning at 3,163,253.**

**#----- predicted by PILER-CR**

```

Array 1
>NC_004342

Pos      Repeat      %id  Spacer  Left flank      Repeat      Spacer
=====
3163253      39   97.4   32  AATAAAATGC      .....C.      GTTCTGATTTTTTCTTTTCTTCTTTTGTTA
3163324      39  100.0   32  CCTTTGTTA      .....      CCCACGATACTACCTGTCAGACCGTGCCCGGA
3163395      39   97.4   32  CGTGCCCGGA      .....G.      ACTCCTCGA
=====
3          39          32  TCTGAATATAACTTTGATGCCGTTAGGCGTTGAGCACAC

```

#----- predicted by CRISPRDetect (partial output)

```

Array 2 3163253-3163504          **** Predicted by CRISPRDetect 2.1 ***
>gi|294827553|ref|NC_004342|-Leptospira interrogans serovar Lai str. 56601 chromosome I,          Array_Orientation: Forward

  Position      Repeat      %id  Spacer  Repeat_Sequence          Spacer_Sequence          Insertion/Deletion
  =====
  3163253       37    100.0   34  ..... CCGTTCTGATTTTTTCTTTTCCTTCCTTTTGTTA
  3163324       37    100.0   34  ..... ACCCCACGATACTACCTGTGACACCGTGCCCGGA
  3163395       37    100.0   34  ..... GCACTCCTCGAACTGGTAAAACTACCGATGCTCG
  3163466       37     89.2    0  C.....T..A.T |          G [3163493]
  =====
  4             37     97.3   34  TCTGAATATAACTTTGATGCCGTTAGGCGTTGAGCAC

# Left flank : AACATGAAAAATAACGATAAAAAACGATATACTTGTCTCTCCTTTGAAAACACTCATATCCACAATTTATGCTTATAAAAGCCATTTAAATAAAATGC
# Right flank : GAAGAGAAGATTTGTTTTGGCCCAAATTGTTTCGCACCAACCGTGCAAACGGATAAAATGTAGGAACTACTACTTTTTTCGAAAAACAGTACTTTGTTCAA

# Questionable array : NO          Score: 5.14
#   Score Detail : 1:1, 2:0, 3:0, 4:0.86, 5:0, 6:1, 7:0.68, 8:0.6, 9:1,
#
#   Score Legend : 1: cas, 2: likely_repeat, 3: motif_match, 4: overall_repeat_identity, 5: one_repeat_cluster, 6: exp_repeat_length, 7:exp_s
#   pacer_length, 8: spacer_identity, 9: log(total repeats) - log(total mutated repeats),
# Primary repeat : TCTGAATATAACTTTGATGCCGTTAGGCGTTGAGCAC
# Alternate repeat : NA

# Directional analysis summary from each method:
#   Motif ATGAAA(N) match prediction: NA Score: 0/4.5
#   A,T distribution in repeat prediction: NA [Repeat is AT rich:56.76%AT]
#   Reference repeat match prediction: NA
#   Secondary Structural analysis prediction: F [-7.60,-3.60] Score: 0.37/0.37
#   Array degeneracy analysis prediction: F [0-5] Score: 0.41/0.41
#   AT richness analysis in flanks prediction: F [71.7-61.7]%AT Score: 0.27/0.27
#   Longer leader analysis prediction: R [366,995] Score: 0.18/0.18
#   -----
#   Final direction: F [1.05,0.18 Confidence: HIGH]

```

**S7B Array extension by joining closely spaced arrays in *Myxococcus fulvus* HW-1 chromosome, array beginning at 2,683,776.** PILER-CR predicted two CRISPRs with the same representative repeat 'GTCGCTCCCCGTGAACGCGGGGAGCGTGGGTTGAAAC' separated by 520 bases. Since PILER-CR and CRT do not support providing any specific gap parameter to join closely spaced array, no further analysis was possible. Providing a higher maximum spacer length of 520 had no effect on the outcome. More detailed analysis using

CRISPRDetect revealed additional repeats and spacers within this 520 base long region. Using the program defaults, both CRISPRDetect and CRISPRFinder, successfully identified a longer CRISPR array instead of two shorter one. However, the array predicted by CRISPRFinder only had 80 repeats, whereas the array predicted by CRISPRDetect contained 104 repeats.

#---- predicted by PILER-CR

Array 9  
>NC\_015711

| Pos     | Repeat | %id   | Spacer | Left flank  | Repeat                               | Spacer                                |
|---------|--------|-------|--------|-------------|--------------------------------------|---------------------------------------|
| 2683776 | 37     | 100.0 | 36     | CGCGGAAATC  | .....                                | CTTCCACCACTGCCAATGCGCCGCTGGGCACCATTTC |
| 2683849 | 37     | 97.3  | 34     | GGCACCATTTC | .....T.....                          | GCGTCGGCCTCCAGCGAGTCGGGCAGCAGGAGAA    |
| 2683920 | 37     | 100.0 | 32     | AGCAGGAGAA  | .....                                | GCCATGCAGTGGCTGGAGGAGTTCGTCCTGCC      |
| 2683989 | 37     | 100.0 | 34     | TCGTCCCTGCC | .....                                | CCTCGCCACCCTCCGCCAAATTTGCCACC GCGTG   |
| 2684060 | 37     | 100.0 | 32     | CCACCGCGTG  | .....                                | ACCGTGGACGGCCGCAACTGGTGCCTGCAC        |
| 2684129 | 37     | 100.0 | 35     | TGCCCTGCAC  | .....                                | AAGTCTCCGTGTTCTCCATGTCGCTTCCCGCCTG    |
| 2684201 | 37     | 100.0 | 37     | TTCCCGCCTG  | .....                                | CCATGACGCTGCCCCCTCGCGGGCCTCGAGCCCGAT  |
| 2684275 | 37     | 100.0 | 35     | CGAGCCCGAT  | .....                                | ACCACCTGTGCGCTTTGGTGGTTCGGCGTAGTGGAT  |
| 2684347 | 37     | 100.0 | 32     | CGTAGTGGAT  | .....                                | GTCACCCACAGCCTGCCAGCGGGCGCCACCTG      |
| 2684416 | 37     | 100.0 | 33     | GCGCCACCTG  | .....                                | ACCCTGGAGGTCGTAGGTCGAACCTCAAGCCGA     |
| 2684486 | 37     | 100.0 | 34     | TTCAAGCCGA  | .....                                | AAGGGCAGCCGTCCGCGCGCTGTCCACCACGGCCT   |
| 2684557 | 37     | 100.0 | 35     | ACCACGGCCT  | .....                                | CCTCCTCCTGGAGGGCGGGTGAATAGCCTGCGCG    |
| 2684629 | 37     | 100.0 | 33     | AGCCTGCGCG  | .....                                | TTCGAACTGCGCGACCGGCGGTGCAGTTCACC      |
| 2684699 | 37     | 100.0 |        | GCAGTTCACC  | .....                                | TGGCACTGCC                            |
| 14      | 37     |       | 34     |             | GTCGCTCCCCGTGAACGCGGGGAGCGTGGGTGAAAC |                                       |

Array 10  
>NC\_015711

| Pos     | Repeat | %id   | Spacer | Left flank  | Repeat      | Spacer                                |
|---------|--------|-------|--------|-------------|-------------|---------------------------------------|
| 2685256 | 37     | 100.0 | 35     | ACCACGGCCT  | .....       | CCTCCTCCTGGAGGGCGGGTGAATAGCCTGCGCG    |
| 2685328 | 37     | 100.0 | 33     | AGCCTGCGCG  | .....       | TTCGAACTGCGCGACCGGCGGTGCAGTTCACC      |
| 2685398 | 37     | 100.0 | 35     | GCAGTTCACC  | .....       | TGGCACTGCGCCTTGACCTCCGAGGCTTGAAGGT    |
| 2685470 | 37     | 100.0 | 33     | GCTTGAAGGT  | .....       | CCCTGACGCTGCCCCCTCGCGGGCCTCGGGCC      |
| 2685540 | 37     | 100.0 | 34     | GCCTCGGGCC  | .....       | AGCGGGCCGAACATCGCCCCGCTGCGGGCGCTT     |
| 2685611 | 37     | 100.0 | 32     | CCGGGCGCTT  | .....       | ACCGTCACCGAGGTTATCCCACCGCTCCCCAC      |
| 2685680 | 37     | 100.0 | 34     | CGCTCCCCAC  | .....       | GCGGGAATCATTACCGACCCGATGGTGTCCCGG     |
| 2685751 | 37     | 100.0 | 32     | GGTGTCCCGG  | .....       | GCAACATCCAGGTGAAGCCCGGCGGAAATC        |
| 2685820 | 37     | 100.0 | 34     | CGCGGAAATC  | .....       | AAGATGACGACACCGCAGCGGGCGCACGTCTGCT    |
| 2685891 | 37     | 100.0 | 36     | CACGCTGTGCT | .....       | CTTCCACCACTGCCAATGCGCCGCTGGGCACCATTTC |
| 2685964 | 37     | 97.3  | 34     | GGCACCATTTC | .....T..... | GCGTCGGCCTCCAGCGAGTCGGGCAGCAGGAGAA    |
| 2686035 | 37     | 100.0 | 35     | AGCAGGAGAA  | .....       | TGGTGGATGTGGTGGTTCGACGCGTCCGGCACCCG   |
| 2686107 | 37     | 100.0 | 35     | CCGGCACCCG  | .....       | GTAATCATCCGCTGGCCGCCCTTCCAGCGCAG      |

|         |       |       |       |             |                   |                                       |
|---------|-------|-------|-------|-------------|-------------------|---------------------------------------|
| 2686179 | 37    | 100.0 | 32    | TCCAGCGCAG  | .....             | CGCAACACGCCGATCCTCACGCTCGGAAGAA       |
| 2686248 | 37    | 100.0 | 36    | TCGCGAAGAA  | .....             | GCTTCCTGCGAGACAACGACTCGGACCCGATCCCCA  |
| 2686321 | 37    | 100.0 | 35    | CCGATCCCCA  | .....             | CAGCTCCAGCGCACCGTCCGGTTATCGCTCCGGCC   |
| 2686393 | 37    | 100.0 | 34    | CGCTCCGGCG  | .....             | GCGGGCGGTTCGATGAACACCTGATTGCCGAACCC   |
| 2686464 | 37    | 100.0 | 34    | TGCCGAACCC  | .....             | CGGTCTCCCTTCGCGGTCCGGAGGAGAAGGGGCC    |
| 2686535 | 37    | 100.0 | 32    | AGAAGGGGCC  | .....             | ATAGGGCCTGGGGAGCCATGGGCCCTTGAAGC      |
| 2686604 | 37    | 100.0 | 32    | CCCTTGAAGC  | .....             | ATAGGGCCTGGGGAGCCATGGGCCCTTGAAGC      |
| 2686673 | 37    | 100.0 | 32    | CCCTTGAAGC  | .....             | ATAGGGCCTGGGGAGCCATGGGCCCTTGAAGC      |
| 2686742 | 37    | 100.0 | 32    | CCCTTGAAGC  | .....             | ATAGGGCCTGGGGAGCCATGGGCCCTTGAAGC      |
| 2686811 | 37    | 100.0 | 34    | CCCTTGAAGC  | .....             | CGTGGTTTCGGGGCGGCGCAGGTGGCTCCCGAC     |
| 2686882 | 37    | 100.0 | 34    | GGCTCCCGAC  | .....             | GCGCGATAGACGCTCATGGCCGTCTCGTCGTGGT    |
| 2686953 | 37    | 97.3  | 34    | TCGTTCGTGGT | .....T.....       | GCGCGATAGACGCTCATGGCCGTCTCGTCGTGGT    |
| 2687024 | 37    | 97.3  | 34    | TCGTTCGTGGT | .....T.....       | GCGCGATAGACGCTCATGGCCGTCTCGTCGTGGT    |
| 2687095 | 37    | 100.0 | 35    | TCGTTCGTGGT | .....             | ACATGGCTGACGGGCTTCGCGCGGACGCGGTGTG    |
| 2687167 | 37    | 100.0 | 32    | CGCGGTGTGC  | .....             | ATAGGGCCTGGGGAGCCATGGGCCCTTGAAGC      |
| 2687236 | 37    | 100.0 | 33    | CCCTTGAAGC  | .....             | CGCCGACCGGGAGCGGGCCATGGAATCCTGGT      |
| 2687306 | 37    | 100.0 | 33    | AAATCCTGGT  | .....             | CGCCGACCGGGAGCGGGCCATGGAATCCTGGT      |
| 2687376 | 37    | 100.0 | 33    | AAATCCTGGT  | .....             | CGCCGACCGGGAGCGGGCCATGGAATCCTGGT      |
| 2687446 | 37    | 100.0 | 33    | AAATCCTGGT  | .....             | CGCCGACCGGGAGCGGGCCATGGAATCCTGGT      |
| 2687516 | 37    | 100.0 | 33    | AAATCCTGGT  | .....             | CGCCGACCGGGAGCGGGCCATGGAATCCTGGT      |
| 2687586 | 37    | 97.3  | 33    | AAATCCTGGT  | .....T.....       | GGCATCAGCAACGCCGGTGTCTCGAATGCG        |
| 2687656 | 37    | 94.6  | 36    | CTCGAATGCG  | .....A.....A..... | GTCCTCTGCGGTTTACGTAGCCCAGCACCTTGCC    |
| 2687729 | 37    | 94.6  | 36    | GCACCTTGCC  | .....T.....A..... | ACCCGTGCCAGCGTTCGAGGCCCGCCTGGGCGGGTAC |
| 2687802 | 37    | 97.3  | 36    | GGCGGGGTAC  | .....A.....       | GTCCTCTGCGGTTTACGTAGCCCAGCACCTTGCC    |
| 2687875 | 37    | 100.0 |       | GCACCTTGCC  | .....             | CGAGTGAGCA                            |
| =====   | ===== | ===== | ===== | =====       | =====             | =====                                 |
| 38      | 37    |       | 33    |             |                   | GTGCTCCCCGTGAACGCGGGGAGCGTGGGTTGAAAC  |

**#---- predicted by CRISPRFinder (the sets of identical spacers shown in red, green and blue are identical to each other)**

```

# Program: Crispr Finder Program
# Author: Ibtissem GRISSA
# Rundate (GMT): 23/8/2013 1:43:22
# Report_file: /var/www/html/CRISPR/Server/.tmp/Output/139.80.26.223_Aug_21_2013_06_06_13/tmp_1/tmp_1_Crispr_4
#####
#=====
#
# Sequence: tmp_1
# Description:
# Length: 9003593
# Id: NC_015711
#
#=====
# Crispr Rank in the sequence: 5
# Crispr_begin_position: 2682223          Crispr_end_position: 2687911
# DR: GTCGCTCCCCGTGAACGCGGGGAGCGTGGGTTGAAAC   DR_length: 37   Number_of_spacers: 79
#=====

```

| Spacer_begin_position | Spacer_length | Spacer_sequence                                                          |
|-----------------------|---------------|--------------------------------------------------------------------------|
| 2682260               | 38            | GTCACCCACAGCCTGCCAGCGGGCCACCGGGCGCTT                                     |
| 2682335               | 73            | ACCCTGGAGGTCGTAGGTCAACTTCAAGCCGTTGAAACAGCGGGCCGAACATCGCCCGGCTGCCGGGCGCTT |
| 2682445               | 34            | AGCGGGCCGAACATCGCCCGGCTGCCGGGCGCTT                                       |
| 2682516               | 34            | AAGGCGACCGTCCGCGCGCTGTCCACCACGGCCT                                       |
| 2682587               | 35            | CCTCCTCCTGGAGGGCGGGGTGAATAGCCTGCGCG                                      |
| 2682659               | 32            | GCAACATCCAGGTGAAGCCCGGCGCGGAAATC                                         |
| 2682728               | 33            | TCGAACTGCGCGACCGGCGGTGACAGTTCACC                                         |
| 2682798               | 32            | GCAACATCCAGGTGAAGCCCGGCGCGGAAATC                                         |
| 2682867               | 34            | GCGTCGGCCTCCAGCGAGTCGGGCAGCAGGAGAA                                       |
| 2682938               | 35            | TGGTGGATGTGGTGGTTCGACGCGTCCGGCACCCG                                      |
| 2683010               | 35            | GTAATCATCCGCTGGCCCGCCCTTCCAGCGCAG                                        |
| 2683082               | 32            | CGCAACACGCCGATCCTCACGCTCGCGAAGAA                                         |
| 2683151               | 34            | GCGTCGGCCTCCAGCGAGTCGGGCAGCAGGAGAA                                       |
| 2683222               | 32            | ACCGTCACCGAGGTATCCACCGCTCCCCAC                                           |
| 2683291               | 32            | GCAACATCCAGGTGAAGCCCGGCGCGGAAATC                                         |
| 2683360               | 34            | GCGGGAATCATTACCGACCCGCATGGTGTCCCGG                                       |
| 2683431               | 32            | GCAACATCCAGGTGAAGCCCGGCGCGGAAATC                                         |
| 2683500               | 32            | GCAACATCCAGGTGAAGCCCGGCGCGGAAATC                                         |
| 2683569               | 32            | GCAACATCCAGGTGAAGCCCGGCGCGGAAATC                                         |
| 2683638               | 32            | GCAACATCCAGGTGAAGCCCGGCGCGGAAATC                                         |
| 2683707               | 69            | AAGATGACGACACCGCAGCGGGCGCACGTCTGAAACGCAACATCCAGGTGAAGCCCGGCGCGGAAATC     |
| 2683813               | 36            | CTTCCACCACTGCCAATGCGCCGCTGGGCACCATT                                      |
| 2683886               | 34            | GCGTCGGCCTCCAGCGAGTCGGGCAGCAGGAGAA                                       |
| 2683957               | 32            | GCCATGCAGTGGCTGGAGGAGTTCGTCTGCC                                          |



|         |    |                                       |
|---------|----|---------------------------------------|
| 2684026 | 34 | CCTCGCCACCCTCCGCCAAATTTGCCACCGCGTG    |
| 2684097 | 32 | ACCGTGGACGGCCGCAACTGGCTGCCCTGCAC      |
| 2684166 | 35 | AAGTCTTCCGTGTTCTCCATGTCGCTTCCCGCCTG   |
| 2684238 | 37 | CCATGACGCTGCCCCCTCTCGGGGCCTCGAGCCCGAT |
| 2684312 | 35 | ACCACCTTGTGCTTTGGTGGTCGGCGTAGTGAT     |
| 2684384 | 32 | GTCACCCACAGCCTGCCAGCGGGCCACCTG        |
| 2684453 | 33 | ACCCTGGAGGTCGTAGGTCAACTTCAAGCCGA      |
| 2684523 | 34 | AAGGCGACCGTCCGCGCGCTGTCCACCACGGCCT    |
| 2684594 | 35 | CCTCCTCCTGGAGGGCGGGTGAATAGCCTGCGCG    |
| 2684666 | 33 | TTCGAACTGCGCGACCGGCGGTGCAGTTCACC      |
| 2684736 | 35 | TGGCACTGCCGCTTGACCTCCGAGGCTTGAAGGT    |
| 2684808 | 32 | ACCGTCACCGAGGTTATCCCACCGCTCCCCAC      |
| 2684877 | 32 | ACCGTCACCGAGGTTATCCCACCGCTCCCCAC      |
| 2684946 | 32 | ACCGTCACCGAGGTTATCCCACCGCTCCCCAC      |
| 2685015 | 32 | ACCGTCACCGAGGTTATCCCACCGCTCCCCAC      |
| 2685084 | 32 | ACCGTCACCGAGGTTATCCCACCGCTCCCCAC      |
| 2685153 | 32 | ACCGTCACCGAGGTTATCCCACCGCTCCCCAC      |
| 2685222 | 34 | AAGGCGACCGTCCGCGCGCTGTCCACCACGGCCT    |
| 2685293 | 35 | CCTCCTCCTGGAGGGCGGGTGAATAGCCTGCGCG    |
| 2685365 | 33 | TTCGAACTGCGCGACCGGCGGTGCAGTTCACC      |
| 2685435 | 35 | TGGCACTGCCGCTTGACCTCCGAGGCTTGAAGGT    |
| 2685507 | 33 | CCCTGACGCTGCCCCCTCTCGGGGCCTCGGGCC     |
| 2685577 | 34 | AGCGGGCCGAACATCGCCCGGCTGCCGGGCGCTT    |
| 2685648 | 32 | ACCGTCACCGAGGTTATCCCACCGCTCCCCAC      |
| 2685717 | 34 | GCGGGAATCATTACCGACCCGCATGGTGTCCCGG    |

|         |    |                                       |
|---------|----|---------------------------------------|
| 2685788 | 32 | GCAACATCCAGGTGAAGCCCGGCGCGGAAATC      |
| 2685857 | 34 | AAGATGACGACACCGCAGCGGGCGCACGTCTGCT    |
| 2685928 | 36 | CTTCCACCACTGCCAATGCGCCGCTGGGCACCATTTC |
| 2686001 | 34 | GCGTCGGCCTCCAGCGAGTCCGGGCAGCAGGAGAA   |
| 2686072 | 35 | TGGTGGATGTGGTGGTTCGACGCGTCCGGCACCCG   |
| 2686144 | 35 | GTAATCATCCGCTGGCCGCCGCCCTTCCAGCGCAG   |
| 2686216 | 32 | CGCAACACGCCGATCCTCACGCTCGCGAAGAA      |
| 2686285 | 36 | GCTTCCTGCGAGACAACGACTCGGACCCGATCCCCA  |
| 2686358 | 35 | CAGCTCCAGCGCACCGTCCGGTTATCGCTCCGGCG   |
| 2686430 | 34 | GCGGGCGGTCGATGAACACCTGATTGCCGAACCC    |
| 2686501 | 34 | CGGTCTCCCTTCGCGGTCCGGAGGAGAAGGGGCC    |
| 2686572 | 32 | ATAGGGCCTGGGGAGCCATGGGCCCTTGAAGC      |
| 2686641 | 32 | ATAGGGCCTGGGGAGCCATGGGCCCTTGAAGC      |
| 2686710 | 32 | ATAGGGCCTGGGGAGCCATGGGCCCTTGAAGC      |
| 2686779 | 32 | ATAGGGCCTGGGGAGCCATGGGCCCTTGAAGC      |
| 2686848 | 34 | CGTGGTTTCGGGGCGGCGCAGGTGGCTCCCGAC     |
| 2686919 | 34 | GCGCGATAGACGCTCATGGCCGTCTCGTCGTGGT    |
| 2686990 | 34 | GCGCGATAGACGCTCATGGCCGTCTCGTCGTGGT    |
| 2687061 | 34 | GCGCGATAGACGCTCATGGCCGTCTCGTCGTGGT    |
| 2687132 | 35 | ACATGGCTGACGGGCTTGCCCGGACGCGGTTGTC    |
| 2687204 | 32 | ATAGGGCCTGGGGAGCCATGGGCCCTTGAAGC      |
| 2687273 | 33 | CGCCGACCGGGAGCGGGCCATGGAAATCCTGGT     |
| 2687343 | 33 | CGCCGACCGGGAGCGGGCCATGGAAATCCTGGT     |
| 2687413 | 33 | CGCCGACCGGGAGCGGGCCATGGAAATCCTGGT     |

```

2687483      33  CGCCGACCGGGAGCGGGCCATGGAATCCTGGT
2687553      33  CGCCGACCGGGAGCGGGCCATGGAATCCTGGT
2687623      33  GGCATCAGCAACGCCCGGTGCTCCTCGAATGCG
2687693      36  GTCCTCTGCGCGTTTACAGTAGCCCAGCACCTTGCC
2687766      36  ACCCGTGCCAGCGTCGAGGCCCGCCTGGGCGGGTAC
2687839      36  GTCCTCTGCGCGTTTACAGTAGCCCAGCACCTTGCC

```

```

=====
#####

```

**#----- predicted by CRISPRDetect (partial output) (using default parameters)**

Array 6 2680594-2687986 \*\*\*\* Predicted by CRISPRDetect 2.1 \*\*\*  
>NC\_015711|Myxococcus-fulvus HW-1 chromosome, complete genome. Array\_Orientation: Forward

| Position | Repeat | %id   | Spacer | Repeat_Sequence | Spacer_Sequence                                                          | Insertion/Deletion |
|----------|--------|-------|--------|-----------------|--------------------------------------------------------------------------|--------------------|
| =====    | =====  | ===== | =====  | =====           | =====                                                                    | =====              |
| 2680594  | 37     | 100.0 | 35     | .....           | CTCTGCAGATGATGCAGTGGGCGGTGGCGGGCTT                                       |                    |
| 2680666  | 37     | 100.0 | 33     | .....           | TCTGGATGCGGAGCCGCTGGCATGACGTAGGCC                                        |                    |
| 2680736  | 37     | 100.0 | 35     | .....           | CTCTGCAGATGATGCAGTGGGCGGTGGCGGGCTT                                       |                    |
| 2680808  | 37     | 100.0 | 33     | .....           | TCTGGATGCGGAGCCGCTGGCATGACGTAGGCC                                        |                    |
| 2680878  | 37     | 100.0 | 34     | .....           | CGGTGCGCGTCCACACGTAGTCGTGCCACCACC                                        |                    |
| 2680949  | 37     | 100.0 | 32     | .....           | ACCGTCACCGAGGTTATCCCACCGTCCCCAC                                          |                    |
| 2681018  | 37     | 100.0 | 34     | .....           | GCGGGAATCATTACCAGCCCGCATGGTGTCCCGG                                       |                    |
| 2681089  | 37     | 100.0 | 32     | .....           | GCAACATCCAGGTGAAGCCCGCGCGGAATC                                           |                    |
| 2681158  | 37     | 100.0 | 34     | .....           | AAGATGACGACACCCGAGCGGGCGCACGTCTGCT                                       |                    |
| 2681229  | 37     | 100.0 | 36     | .....           | CTTCCACCACTGCCAATGCGCCGCTGGGCACCATTC                                     |                    |
| 2681302  | 37     | 97.3  | 34     | .....T.....     | GCGTCGGCCTCCAGCGAGTCGGGCAGCAGGAGAA                                       |                    |
| 2681373  | 37     | 100.0 | 35     | .....           | TGGTGGATGTGGTGGTTCGACGCGTCCGGCACCCG                                      |                    |
| 2681445  | 37     | 100.0 | 35     | .....           | GTAATCATCCGCTGGCCGCCGCCCTTCCAGCGCAG                                      |                    |
| 2681517  | 37     | 100.0 | 32     | .....           | CGCAACACGCCGATCCTCACGCTCGCGAAGAA                                         |                    |
| 2681586  | 37     | 100.0 | 36     | .....           | GCTTCTGCGAGACAACGACTCGGACCCGATCCCCA                                      |                    |
| 2681659  | 37     | 100.0 | 35     | .....           | CAGCTCCAGCGCACCGTCCGGTTATCGCTCCGGCG                                      |                    |
| 2681731  | 37     | 100.0 | 37     | .....           | GGTGGCGGCACCCGCCACTGGGCGACGCTGGAAATG                                     |                    |
| 2681805  | 37     | 100.0 | 34     | .....           | CGTGGTTTCGGGGCGGGCAGGTGGCTCCCGAC                                         |                    |
| 2681876  | 37     | 100.0 | 34     | .....           | GCGCGATAGACGCTCATGGCCGCTCTCGTCGTGGT                                      |                    |
| 2681947  | 37     | 100.0 | 34     | .....           | GCGGGCGGTCGATGAACACCTGATTGCCGAAACC                                       |                    |
| 2682018  | 37     | 100.0 | 37     | .....           | CCATGACGCTGCCCCCTCTCGCGGGCCTCGAGCCCGAT                                   |                    |
| 2682092  | 37     | 100.0 | 22     | .....           | ATCGCCCGGCTGCCGGGCGCTT                                                   | Deletion [2682151] |
| 2682151  | 37     | 100.0 | 35     | .....           | ACCACCTTGTGCTTTGGTGGTTCGGCGTAGTGGAT                                      |                    |
| 2682223  | 37     | 100.0 | 38     | .....           | GTCACCCACAGCCTGCCAGCGGGCCACCAGGGCGCTT                                    |                    |
| 2682298  | 37     | 100.0 | 73     | .....           | ACCTGGAGGTCGTAGGTCGAACCTCAAGCCGTTGAAACAGCGGGCCGAACATCGCCCGGCTGCCGGGCGCTT |                    |
| 2682408  | 37     | 100.0 | 34     | .....           | AGCGGGCCGAACATCGCCCGGCTGCCGGGCGCTT                                       |                    |
| 2682479  | 37     | 100.0 | 34     | .....           | AAGCGACCGTCCGCGCGCTGTCCACCAGGCCT                                         |                    |

|         |    |       |    |             |                                                                    |
|---------|----|-------|----|-------------|--------------------------------------------------------------------|
| 2682550 | 37 | 100.0 | 35 | .....       | CCTCCTCCTGGAGGGCGGGGTGAATAGCCTGCGCG                                |
| 2682622 | 37 | 100.0 | 32 | .....       | GCAACATCCAGGTGAAGCCCGCGCGGAAATC                                    |
| 2682691 | 37 | 100.0 | 33 | .....       | TTCGAACTGCGCGACCCGCGCGTGCAGTTCACC                                  |
| 2682761 | 37 | 100.0 | 32 | .....       | GCAACATCCAGGTGAAGCCCGCGCGGAAATC                                    |
| 2682830 | 37 | 100.0 | 34 | .....       | GCGTCGGCCTCCAGCGAGTCGGGCAGCAGGAGAA                                 |
| 2682901 | 37 | 100.0 | 35 | .....       | TGGTGGATGTGGTGGTTCGACGCGTCCGGCACCCG                                |
| 2682973 | 37 | 100.0 | 35 | .....       | GTAATCATCCCGTGGCCGCCGCCCTCCAGCGCAG                                 |
| 2683045 | 37 | 100.0 | 32 | .....       | CGCAACACGCCGATCCTCACGCTCGCGAAGAA                                   |
| 2683114 | 37 | 100.0 | 34 | .....       | GCGTCGGCCTCCAGCGAGTCGGGCAGCAGGAGAA                                 |
| 2683185 | 37 | 100.0 | 32 | .....       | ACCGTCACCGAGGTTATCCCACCGCTCCCCAC                                   |
| 2683254 | 37 | 100.0 | 32 | .....       | GCAACATCCAGGTGAAGCCCGCGCGGAAATC                                    |
| 2683323 | 37 | 100.0 | 34 | .....       | GCGGGAATCATTACCGACCCGCATGGTGTCCCGG                                 |
| 2683394 | 37 | 100.0 | 32 | .....       | GCAACATCCAGGTGAAGCCCGCGCGGAAATC                                    |
| 2683463 | 37 | 100.0 | 32 | .....       | GCAACATCCAGGTGAAGCCCGCGCGGAAATC                                    |
| 2683532 | 37 | 100.0 | 32 | .....       | GCAACATCCAGGTGAAGCCCGCGCGGAAATC                                    |
| 2683601 | 37 | 100.0 | 32 | .....       | GCAACATCCAGGTGAAGCCCGCGCGGAAATC                                    |
| 2683670 | 37 | 100.0 | 69 | .....       | AAGATGACGACACCCGAGCGGGCGCACGTCGAAACGCAACATCCAGGTGAAGCCCGCGCGGAAATC |
| 2683776 | 37 | 100.0 | 36 | .....       | CTTCCACCACTGCCAATGCGCCGCTGGGCACCATT                                |
| 2683849 | 37 | 97.3  | 34 | .....T..... | GCGTCGGCCTCCAGCGAGTCGGGCAGCAGGAGAA                                 |
| 2683920 | 37 | 100.0 | 32 | .....       | GCCATGCAGTGGCTGGAGGAGTTCGTCCTGCC                                   |
| 2683989 | 37 | 100.0 | 34 | .....       | CCTCGCCACCTCCGCCAAATTTGCCACCGCGTG                                  |
| 2684060 | 37 | 100.0 | 32 | .....       | ACCGTGGACGGCCGCAACTGGCTGCCCTGCAC                                   |
| 2684129 | 37 | 100.0 | 35 | .....       | AAGTCTTCGGTGTCTCCATGTCGCTTCCCGCCTG                                 |
| 2684201 | 37 | 100.0 | 37 | .....       | CCATGACGCTGCCCTCTCGGGGCTCGAGCCCGAT                                 |
| 2684275 | 37 | 100.0 | 35 | .....       | ACCACCTTGTCGCTTTGGTGGTTCGGGTAGTGGAT                                |
| 2684347 | 37 | 100.0 | 32 | .....       | GTCACCCACAGCCTGCCAGCGGGCCACCTG                                     |
| 2684416 | 37 | 100.0 | 33 | .....       | ACCCTGGAGGTGCTAGGTGCAACTTCAAGCCGA                                  |
| 2684486 | 37 | 100.0 | 34 | .....       | AAGGCGACCGTCCGCGCGCTGCCACCGCCT                                     |
| 2684557 | 37 | 100.0 | 35 | .....       | CCTCCTCCTGGAGGGCGGGTGAATAGCCTGCGCG                                 |
| 2684629 | 37 | 100.0 | 33 | .....       | TTCGAACTGCGCGACCCGCGCGTGCAGTTCACC                                  |
| 2684699 | 37 | 100.0 | 35 | .....       | TGGCACTGCCGCTTGACCTCCGCAGGCTTGAAGGT                                |
| 2684771 | 37 | 100.0 | 32 | .....       | ACCGTCACCGAGGTTATCCCACCGCTCCCCAC                                   |
| 2684840 | 37 | 100.0 | 32 | .....       | ACCGTCACCGAGGTTATCCCACCGCTCCCCAC                                   |
| 2684909 | 37 | 100.0 | 32 | .....       | ACCGTCACCGAGGTTATCCCACCGCTCCCCAC                                   |
| 2684978 | 37 | 100.0 | 32 | .....       | ACCGTCACCGAGGTTATCCCACCGCTCCCCAC                                   |
| 2685047 | 37 | 100.0 | 32 | .....       | ACCGTCACCGAGGTTATCCCACCGCTCCCCAC                                   |
| 2685116 | 37 | 100.0 | 32 | .....       | ACCGTCACCGAGGTTATCCCACCGCTCCCCAC                                   |
| 2685185 | 37 | 100.0 | 34 | .....       | AAGGCGACCGTCCGCGCGCTGCCACCGCCT                                     |
| 2685256 | 37 | 100.0 | 35 | .....       | CCTCCTCCTGGAGGGCGGGTGAATAGCCTGCGCG                                 |
| 2685328 | 37 | 100.0 | 33 | .....       | TTCGAACTGCGCGACCCGCGCGTGCAGTTCACC                                  |
| 2685398 | 37 | 100.0 | 35 | .....       | TGGCACTGCCGCTTGACCTCCGCAGGCTTGAAGGT                                |
| 2685470 | 37 | 100.0 | 33 | .....       | CCCTGACGCTGCCCTCTCGGGGCTCGGGCC                                     |
| 2685540 | 37 | 100.0 | 34 | .....       | AGCGGGCCGAACATCGCCCGGCTGCCGGCGCTT                                  |
| 2685611 | 37 | 100.0 | 32 | .....       | ACCGTCACCGAGGTTATCCCACCGCTCCCCAC                                   |
| 2685680 | 37 | 100.0 | 34 | .....       | GCGGGAATCATTACCGACCCGCATGGTGTCCCGG                                 |
| 2685751 | 37 | 100.0 | 32 | .....       | GCAACATCCAGGTGAAGCCCGCGCGGAAATC                                    |
| 2685820 | 37 | 100.0 | 34 | .....       | AAGATGACGACACCCGAGCGGGCGCACGTCGCT                                  |
| 2685891 | 37 | 100.0 | 36 | .....       | CTTCCACCACTGCCAATGCGCCGCTGGGCACCATT                                |
| 2685964 | 37 | 97.3  | 34 | .....T..... | GCGTCGGCCTCCAGCGAGTCGGGCAGCAGGAGAA                                 |
| 2686035 | 37 | 100.0 | 35 | .....       | TGGTGGATGTGGTGGTTCGACGCGTCCGGCACCCG                                |
| 2686107 | 37 | 100.0 | 35 | .....       | GTAATCATCCCGTGGCCGCCGCCCTCCAGCGCAG                                 |
| 2686179 | 37 | 100.0 | 32 | .....       | CGCAACACGCCGATCCTCACGCTCGCGAAGAA                                   |
| 2686248 | 37 | 100.0 | 36 | .....       | GCTTCTGCGAGACAACGACTCGGACCCGATCCCCA                                |
| 2686321 | 37 | 100.0 | 35 | .....       | CAGTCCAGCGCACCGTCCGGTTATCGCTCCGGCG                                 |
| 2686393 | 37 | 100.0 | 34 | .....       | GCGGGCGGTTCGATGAACACCTGATTGCCGAACCC                                |
| 2686464 | 37 | 100.0 | 34 | .....       | CGGTCTCCTTCGCGGTCCGAGGAGAAGGGCC                                    |

```

2686535      37   100.0   32   .....
2686604      37   100.0   32   .....
2686673      37   100.0   32   .....
2686742      37   100.0   32   .....
2686811      37   100.0   34   .....
2686882      37   100.0   34   .....
2686953      37    97.3   34   .....T.....
2687024      37    97.3   34   .....T.....
2687095      37   100.0   35   .....
2687167      37   100.0   32   .....
2687236      37   100.0   33   .....
2687306      37   100.0   33   .....
2687376      37   100.0   33   .....
2687446      37   100.0   33   .....
2687516      37   100.0   33   .....
2687586      37    97.3   33   .....T.....
2687656      37    94.6   36   .....A.....A....
2687729      37    94.6   36   .....T.....A....
2687802      37    97.3   36   .....A....
2687875      37   100.0   37   .....
2687949      37    81.1   0    C..A..T.T.....T..A...T.....
=====
104          37   99.5   34   GTCGCTCCCCGTGAACGCGGGGAGCGTGGGTTGAAAC
# Left flank :   AGGCGGTGGCATGGGAGGCCGGGTGGCTGCATGGCGCGCCGGCAGGTTCCGCGAAATGCGGCCGAATCCCGCAGGAAGATCGGTATGTTGGAAGGGCAGG
# Right flank :   GCATTAGCGAGCTTGAGTTGGCAGGCCGTTGGGGGAGTGCCTCCTCGTGGCCGCTTGGCCCGTATGGGCATCCAGTGGCCGTTTCTGTTGAGCCGACA

# Questionable array : NO Score: 0.62
# Score Detail : 1:0, 2:0, 3:0, 4:0.97, 5:0, 6:1, 7:0.65, 8:-3, 9:1,
# Score Legend : 1: cas, 2: known_repeat, 3: motif_match, 4: overall_repeats_identity, 5: minimum_2_identical_repeats, 6: model_repeat_length, 7:spacer_lengths, 8:
spacer_identity, 9: log(no_of_perfect_repeats),
# Primary repeat :   GTCGCTCCCCGTGAACGCGGGGAGCGTGGGTTGAAAC
# Alternate repeat :   NA

# Directional analysis summary from each method:
#   Motif ATGAAA(N) match prediction:      NA Score: 0/4.5
#   A,T distribution in repeat prediction:  NA [6,6] Score: 0.37/0.37
#   Reference repeat match prediction:      NA
#   Secondary Structural analysis prediction: F [-12.10,-10.40] Score: 0.37/0.37
#   Array degeneracy analysis prediction:    F [1-14] Score: 0.41/0.41
#   AT richness analysis in flanks prediction: NA [40.0-35.0]%AT Score: 0/0.27
#   Longer leader analysis prediction:      NA [184,367] Score: 0/0.18
#   -----
#   Final direction:      F [0.78,0] Confidence: HIGH]

```

**S7C Example of array splitting due to non-identification of a propagating mutation in a CRISPR array.** The CRISPR array from position 856227 to 857471 in the *Pyrobaculum neutrophilum* V24Sta chromosome contains mutation in the middle of the repeat (repeat no 12) that propagated to the next 6 repeats (up to repeat number 18). This event was not handled correctly by PILER-CR, which divided the array into two shorter ones with the following two representative repeats. As shown in the following alignment, both the

repeats are almost identical (except the bases shown in red) and should be predicted as a single array. CRISPRDetect uses methods like dynamic search to handle cases like this, which can adapt changes within an array. In the dynamic search method, instead of a fixed representative repeat, the closest repeat is used as the representative repeat during array extension. This ensures a better representation of the array as well as improves the array quality score.

```

Representative repeat1:  GAATCTCAAGTTGAGGATTGAAAG
                        | | | | | | | | | | | | | | | | | |
Representative repeat2:  GAATCTCAAAGAGAGGATTGAAAG
  
```

**#----- predicted by PILER-CR**

Array 4

>gi|171184485|ref|NC\_010525.1|Pyrobaculumneutrophilum V24Sta chromosome, complete

| Pos    | Repeat | %id   | Spacer | Left flank  | Repeat                   | Spacer                                          |
|--------|--------|-------|--------|-------------|--------------------------|-------------------------------------------------|
| 856227 | 24     | 100.0 | 48     | AGAAGACCCA  | .....                    | CGATCAGCTTGACGATCGTGGAGTGATTACCGACTTCTGCTCCTCGG |
| 856299 | 24     | 100.0 | 45     | TGCTCCTCGG  | .....                    | CGTAGTGGTAATCTCTAATCTCTAATGATGTCCTCATCTCCA      |
| 856368 | 24     | 100.0 | 42     | TCATTCTCCA  | .....                    | CTTCATGACCGCATTAATATATATCGGGTCTTGCAATTGCTAC     |
| 856434 | 24     | 100.0 | 41     | GCATTGCTAC  | .....                    | CCTCGAGGAAGGCGTGGGGATCCCTGGCCAGCAGCTCAGCC       |
| 856499 | 24     | 100.0 | 42     | CAGCTCAGCC  | .....                    | TTTAACCGCAGAACTTGTCGATAACTGAAAAACGGGGTTG        |
| 856565 | 24     | 100.0 | 45     | AACGGGGTTG  | .....                    | TTGTACTCTTATAGAAACGTATTGTGGCCACCTTACGGCGGAGTG   |
| 856634 | 24     | 100.0 | 44     | CGGCGGAGTG  | .....                    | CAGTCTCCGCGGATGCTTGTGCATCGTTGCGGCGCCGACAACCTCA  |
| 856702 | 24     | 100.0 | 41     | CGACAACCTCA | .....                    | ATCTTCACAGCGTAGTACACCTGCGTGTGGCTGAGGGAGAG       |
| 856767 | 24     | 100.0 | 38     | TGAGGGAGAG  | .....                    | CGTCTAGGACGAGGGGCACTATCATTATGCGCCTGTCC          |
| 856829 | 24     | 100.0 | 43     | GCGCCTGTCC  | .....                    | CTCAGCTTGTAGACGTTCTCCATGTATTATCGATATAGTACA      |
| 856896 | 24     | 100.0 |        | ATATAGTACA  | .....                    | CTCCACCA                                        |
| =====  | =====  | ===== | =====  | =====       | =====                    | =====                                           |
| 11     | 24     |       | 42     |             | GAATCTCAAGTTGAGGATTGAAAG |                                                 |

Array 5

>gi|171184485|ref|NC\_010525.1|Pyrobaculumneutrophilum V24Sta chromosome, complete

| Pos    | Repeat | %id   | Spacer | Left flank  | Repeat      | Spacer                                                |
|--------|--------|-------|--------|-------------|-------------|-------------------------------------------------------|
| 856966 | 24     | 95.8  | 48     | CATGTATTGG  | .....A..... | CAAATACATGTAATACGTTGCAGTATTCTTATACAGCCTACTCTTTAC      |
| 857038 | 24     | 95.8  | 43     | TACTCTTTAC  | .....A..... | AATTGCCCCACGACTTGGGGGAGAGAAACGGCGGCGTGGGGT            |
| 857105 | 24     | 100.0 | 45     | GCGTGGGGT   | .....       | AGGAGAGCGGCGTCGACGACGTCGCCCTTCCGGGAACTTGGGA           |
| 857174 | 24     | 95.8  | 54     | GAACTTGGGA  | .....A..... | ATAACATCCATAAGGTTTATTGGTGTGCGAATGGCACCTCTTCATTGGGCAGA |
| 857252 | 24     | 100.0 | 41     | ATTGGGCGAGA | .....       | TCCACCACAGACCCGTAATTGTATACCACCGGAATACCT               |
| 857317 | 24     | 100.0 | 43     | GCGAATACCT  | .....       | ATCTGTATATGCGCCAACCTGTCAATAAGCGGGTCTGCGTTTT           |
| 857384 | 24     | 95.8  |        | TCTGCGTTTT  | .....G..... | TGCACCGGAA                                            |
| =====  | =====  | ===== | =====  | =====       | =====       | =====                                                 |

#----- Predicted by CRISPRDetect (partial output) [array extension without using the Dynamic search method]

Array 5 856227-857472 \*\*\*\* Predicted by CRISPRDetect 2.1 \*\*\*  
 >gi|171184485|ref|NC\_010525|-Pyrobaculum neutrophilum V24Sta chromosome, complete genome. Array\_Orientation: Forward

| Position           | Repeat | %id   | Spacer | Repeat_Sequence          | Spacer_Sequence                                       |            |
|--------------------|--------|-------|--------|--------------------------|-------------------------------------------------------|------------|
| Insertion/Deletion |        |       |        |                          |                                                       |            |
| 856227             | 24     | 100.0 | 48     | .....                    | CGATCAGCTTGACGATCGTGGAGTGTATTACCGACTTCTGCTCCTCGG      |            |
| 856299             | 24     | 100.0 | 45     | .....                    | CGTAGTGGTAATCTCTAATCTCTAATGATGTCCTCATTCTCCA           |            |
| 856368             | 24     | 100.0 | 42     | .....                    | CTTCATGACCGCATTAAATATATCGGGGTCTTGCAATTGCTAC           |            |
| 856434             | 24     | 100.0 | 41     | .....                    | CCTCGAGGAAGGCGTGGGGATCCCTGGCCAGCAGCTCAGCC             |            |
| 856499             | 24     | 100.0 | 42     | .....                    | TTTAACCGCAGAACTTGTCGATAACTGAAAAACGGGGTTG              |            |
| 856565             | 24     | 100.0 | 45     | .....                    | TTGTACTCTTATAGAAACGTATTGTGGCCACCTACGGCGGAGTG          |            |
| 856634             | 24     | 100.0 | 44     | .....                    | CAGTCTCGCGGATGCTGTGCATCGTTCGGCGCCGACAACCTCA           |            |
| 856702             | 24     | 100.0 | 41     | .....                    | ATCTTACAGCGTAGTACACCTGCGTGTGGCTGAGGGAGAG              |            |
| 856767             | 24     | 100.0 | 38     | .....                    | CGTCTAGGACGAGGGGCACTATCATTATGCGCCTGTCC                |            |
| 856829             | 24     | 100.0 | 43     | .....                    | CTCAGCTTGTAGACGTTCTCCATGTATTCATCGATATAGTACA           |            |
| 856896             | 24     | 100.0 | 46     | .....                    | CTCCACCAACGTCCTTATCTCTTTTAGGCATATTTCCATGTATTGG        |            |
| 856966             | 24     | 87.5  | 48     | .....AAA.....            | CAAATACATGTAATACGTTGCAGTATTCTTATACAGCCTACTCTTTAC      |            |
| 857038             | 24     | 87.5  | 43     | .....AAA.....            | AATTGCCCCACGACTTGGGGGAGAGAAACGGCGCGCTGGGGGT           |            |
| 857105             | 23     | 91.7  | 45     | .....-A.....             | AGGAGAGCGGCGTCGACGACGTCGCCCTTCCGGGGAACCTGGGA          | A [857112] |
| 857174             | 24     | 87.5  | 54     | .....AAA.....            | ATAACATCCATAAGGTTTATTGGTCGTGCGAATGGCACCTCTCATTGGGCAGA |            |
| 857252             | 23     | 91.7  | 41     | .....-A.....             | TCCACCACAGAGCCCGTAATTGTATACCACCGCAATACCT              | A [857259] |
| 857317             | 23     | 91.7  | 43     | .....-A.....             | ATCTGTATATGCGCCAACCTGTCAATAAGCGGGTCTGCGTTTT           | A [857324] |
| 857384             | 23     | 91.7  | 40     | .....-A.....             | TGCACCGAATGCACCGAAAACCTACACTGTGCCCTGA                 | G [857391] |
| 857448             | 24     | 95.8  | 0      | .....T.....              |                                                       |            |
| 19                 | 24     | 96.1  | 44     | GAATCTCAAGTTGAGGATTGAAAG |                                                       |            |

#----- Predicted by CRISPRDetect [array extension using the Dynamic search method]

Array 5 856227-857471 \*\*\*\* Predicted by CRISPRDetect 2.1 \*\*\*  
 >gi|171184485|ref|NC\_010525.1|Pyrobaculum neutrophilum V24Sta chromosome, complete genome Array\_Orientation: Unconfirmed

| Position           | Repeat | %id   | Spacer | Repeat_Sequence | Spacer_Sequence                                  |
|--------------------|--------|-------|--------|-----------------|--------------------------------------------------|
| Insertion/Deletion |        |       |        |                 |                                                  |
| 856227             | 24     | 100.0 | 48     | .....           | CGATCAGCTTGACGATCGTGGAGTGTATTACCGACTTCTGCTCCTCGG |
| 856299             | 24     | 100.0 | 45     | .....           | CGTAGTGGTAATCTCTAATCTCTAATGATGTCCTCATTCTCCA      |

|        |       |       |       |                          |                                                        |
|--------|-------|-------|-------|--------------------------|--------------------------------------------------------|
| 856368 | 24    | 100.0 | 42    | .....                    | CTTCATGACCGCATTAAATATATCGGGGTCTTGCAATTGCTAC            |
| 856434 | 24    | 100.0 | 41    | .....                    | CCTCGAGGAAGGCGTGGGGATCCCTGGCCAGCAGCTCAGCC              |
| 856499 | 24    | 100.0 | 42    | .....                    | TTTAACCGCAGAACTTGTGATAACTGAAAAACGGGGTTG                |
| 856565 | 24    | 100.0 | 45    | .....                    | TTGTACTCTTATAGAAACGTATTGTGGCCACCTTACGGCGGAGTG          |
| 856634 | 24    | 100.0 | 44    | .....                    | CAGTCTCCGCGGATGCTTGTGCATCGTTCGGCGCCGACAACCTCA          |
| 856702 | 24    | 100.0 | 41    | .....                    | ATCTTCACAGCGTAGTACACCTGCGTGTGGCTGAGGGAGAG              |
| 856767 | 24    | 100.0 | 38    | .....                    | CGTCTAGGACGAGGGGCACTATCATTATGCGCCTGTCC                 |
| 856829 | 24    | 100.0 | 43    | .....                    | CTCAGCTGTAGACGTTCTCCATGTATTCATCGATATAGTACA             |
| 856896 | 24    | 100.0 | 46    | .....                    | CTCCACCAACGTCCTTATCTCTTTTAGGCATATTTCCATGTATTGG         |
| 856966 | 24    | 87.5  | 48    | .....AAA.....            | CAAATACATGTAATACGTTGCAGTATTCTTATACAGCCTACTCTTTAC       |
| 857038 | 24    | 87.5  | 43    | .....AAA.....            | AATTGCCCCACGACTTGGGGGAGAGAAACGGCGGCGTGGGGGT            |
| 857105 | 24    | 87.5  | 45    | .....AGA.....            | AGGAGAGCGGCGTCGACGACGTCCGCCCTTCCGGGGAACCTGGGA          |
| 857174 | 24    | 87.5  | 54    | .....AAA.....            | ATAACATCCATAAGGTTTATTGGTCGTGCGAATGGCACCTCTTCATTGGGCAGA |
| 857252 | 24    | 87.5  | 41    | .....AGA.....            | TCCACCACAGAGCCCGTAATTGTATACCACCGGAATACCT               |
| 857317 | 24    | 87.5  | 43    | .....AGA.....            | ATCTGTATATGCGCCAACCTGTCAATAAGCGGGTCTGCGTTTT            |
| 857384 | 24    | 83.3  | 40    | .....G.AGA.....          | TGCACCGGAATGCACCGGAAAACCTACACTGTGCCCTGA                |
| 857448 | 23    | 83.3  | 0     | .....-T.AG.....          |                                                        |
| =====  | ===== | ===== | ===== | =====                    | =====                                                  |
| =====  | ===== | ===== | ===== | =====                    | =====                                                  |
| 19     | 24    | 94.3  | 44    | GAATCTCAAGTTGAGGATTGAAAG |                                                        |

T [857459]



**Additional File S8A Identification of tandem repeats. The region 982819 to 982966 in the *Bacillus cereus* ATCC 10987 complete genome contains 7 near identical 21 nt long repeats.** This region was predicted as a CRISPR array by CRT but is not detected with a score > - 4.0 by CRISPRDetect. Note that the non-identical columns 3/4 matches at the beginning of the spacer make this appear like a CRISPR. CRISPRDetect has functions and scoring which eliminate such tandem repeats

**#----- predicted by CRT**

```
>NC_003909
CRISPR 8   Range: 982851 - 983084
POSITION   REPEAT           SPACER
-----
982851     GTGGAGAAACAGAAACACCAGGTG   GAGAAACAGAAACACCAGGCGAAGAAACAGAGAAACCAG   [ 24, 39 ]
982914     GTGAAGAAACAGAAAAGCCAGGTG   AGGAAACAGAAAAGCCAGGCGAAGAGACAGGAAAACCGG   [ 24, 39 ]
982977     GTGAAGAAACAGAGAAACCAGGTG   AAGAGACAGGAAAACCGG   [ 24, 18 ]
983019     GTGAAGAAACAGAGAAGCCAGGTG   AAGAGACAGGAACATCAG   [ 24, 18 ]
983061     GTGAAGAAACAGAGAAGCCAGGTG
-----
Repeats: 5   Average Length: 24   Average Length: 28
```

**S8B Example of multiple identical spacers in an array.** CRISPRs often contains multiple identical spacers together with non-identical spacers, as shown in the example CRISPR of *Methanocaldococcus jannaschii* DSM 2661 chromosome. The spacers in red are identical.

```
Array 4 236564-238185   **** Predicted by CRISPRDetect 2.1 ****
>gi|15668172|ref|NC_000909|-Methanocaldococcus jannaschii DSM 2661 chromosome, complete genome.   Array_Orientation: Forward
```

| Position | Repeat | %id   | Spacer | Repeat_Sequence | Spacer_Sequence                                    |
|----------|--------|-------|--------|-----------------|----------------------------------------------------|
| 236564   | 30     | 100.0 | 42     | .....           | GATATTATTAACAACATAATCAGTGTAAATGTATAGATATG          |
| 236636   | 30     | 100.0 | 36     | .....           | ATTTGATGATTTGGTGGATTATACAAATAGAAATTA               |
| 236702   | 30     | 100.0 | 39     | .....           | TACTGTTAAATATTCAGATTTATTAATCAGTTATTTCCCT           |
| 236771   | 30     | 100.0 | 38     | .....           | GATTTTCTTATGTTTAAATCCCTTATGAACGCTCGGAT             |
| 236839   | 30     | 100.0 | 36     | .....           | TCTTTATCTCTTTACAGTATCGTATCTTAATTTT                 |
| 236905   | 30     | 100.0 | 51     | .....           | TTTTCAACAAGCATTCTAACAAGTTTGGAGGTAATACTGCAACAATTTCA |
| 236986   | 30     | 93.3  | 38     | G.....C         | GTGATTGTAGAATTCTCATCTTCTTCTTGGGAGAGCCG             |
| 237054   | 30     | 100.0 | 38     | .....           | GATTGGATGAGGGATATATCCAAAACATAAAAGGATTG             |
| 237122   | 30     | 100.0 | 37     | .....           | CTGTTAGGGAACCCATAAAAGGTTCCCTTGAGGGTTC              |
| 237189   | 30     | 100.0 | 37     | .....           | CTGTTAGGGAACCCATAAAAGGTTCCCTTGAGGGTTC              |
| 237256   | 30     | 100.0 | 37     | .....           | CTGTTAGGGAACCCATAAAAGGTTCCCTTGAGGGTTC              |
| 237323   | 30     | 100.0 | 37     | .....           | CTGTTAGGGAACCCATAAAAGGTTCCCTTGAGGGTTC              |
| 237390   | 30     | 100.0 | 37     | .....           | CTGTTAGGGAACCCATAAAAGGTTCCCTTGAGGGTTC              |
| 237457   | 30     | 100.0 | 37     | .....           | CTGTTAGGGAACCCATAAAAGGTTCCCTTGAGGGTTC              |

|        |    |       |    |                               |                                                 |
|--------|----|-------|----|-------------------------------|-------------------------------------------------|
| 237524 | 30 | 100.0 | 37 | .....                         | CTGTTAGGGAACCCATAAAAGGTTCCCTTGAGGGTTC           |
| 237591 | 30 | 100.0 | 43 | .....                         | TCATTTGCATCATTTGTGCTGGGTCTGGCTGACTCTGTGTGTC     |
| 237664 | 30 | 96.7  | 35 | .....T.....                   | TTCTTGGAAATTGCTAAGTGGTTTATGCATAGTTGC            |
| 237729 | 30 | 100.0 | 37 | .....                         | ATGAGATTCAATTCCTTTGATCGAGGGCGATAGAGGTTTC        |
| 237796 | 30 | 100.0 | 39 | .....                         | GAATTTTTCGCACACGGCTACATCTAATAAACAGATTTC         |
| 237865 | 30 | 100.0 | 38 | .....                         | GATGAAAAGAAAGCAATTGAAACAGCTATTATAACTTA          |
| 237933 | 30 | 100.0 | 47 | .....                         | ATACCATTAACAATTTTCATATATCTGTTTTTGTATTCAATCTTTTT |
| 238010 | 30 | 96.7  | 46 | .....G                        | CATAGATTATTTTAAAGCTGTTTTTTGGATTTTCTAATTTTAAATT  |
| 238087 | 30 | 93.3  | 38 | .....G..C                     | AATGTTCTAAATTCTCCTTGTAAATTCCTAATGTTGT           |
| 238155 | 30 | 96.7  | 0  | .....A.....                   |                                                 |
| =====  |    |       |    |                               | =====                                           |
| 24     | 30 | 99.0  | 39 | ATTAAATCAGACCGTTTCGGAATGGAAAT | C [238039]                                      |

**Additional File S9 Schematic of removal of degenerated repeats at either end of CRISPRs. A. Before refinement. B. After refinement.** The repeats with degeneracy above the cutoff are removed from either end, producing a CRISPR with higher quality score. This function is useful in predicting arrays, which could be otherwise excluded due to a poor quality score. Once the quality score is checked, and an array is identified to be a potential CRISPR, the CRISPRDetect pipeline will try to extend the arrays both ends with lower identity cutoff, to make the degenerated repeats be shown in the final output.

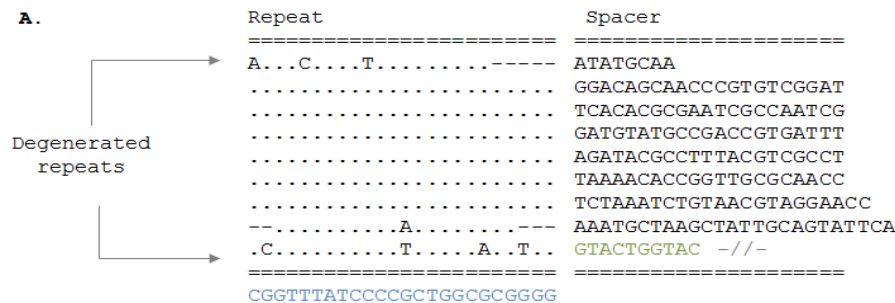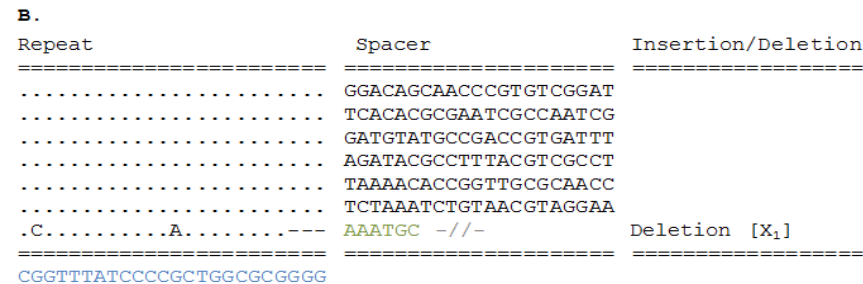

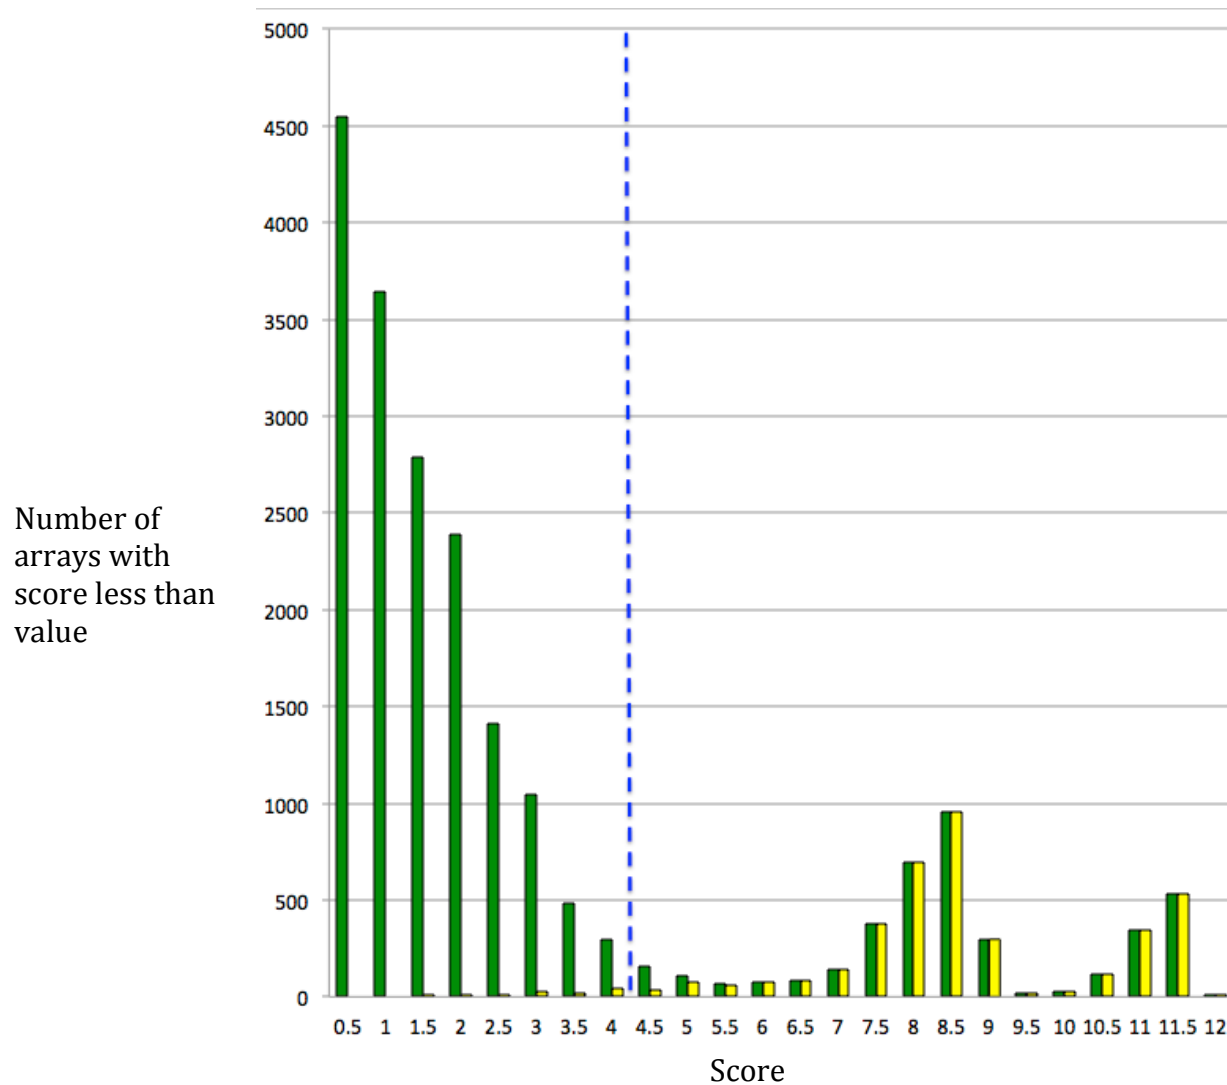

**Additional file S10. Frequency counts for all predictions from CRISPRDetect.** Only the scores above 0 are shown (these are included in CRISPRBank). Arrays with poor scores (<4.0 blue dotted line) would be flagged as 'questionable' in the output. Scores for CRISPRs with known repeats are shown as yellow bars, a match to these repeats adds additional +3 resulting in high scores.
